# Supplementary material for: Mechanical Assembly Packing Problem Using Joint Constraints
Source: Springer Nature journal article supplement (doi:10.1007/s11390-017-1791-2), 2017-11-01

# Mechanical Assembly Packing Problem using Joint Constraints



Mingliang Xu, Ningbo Gu, Weiwei Xu, Kai Xu, Mingyuan Li,  
Junxiao Xue, Bing Zhou

Xu ML, Gu NB, Xu WW et al. Mechanical assembly packing problem using joint constraints. JOURNAL OF COMPUTER SCIENCE AND TECHNOLOGY 32(6): 1162 – 1171 Nov. 2017. DOI 10.1007/s11390-017-1791-2

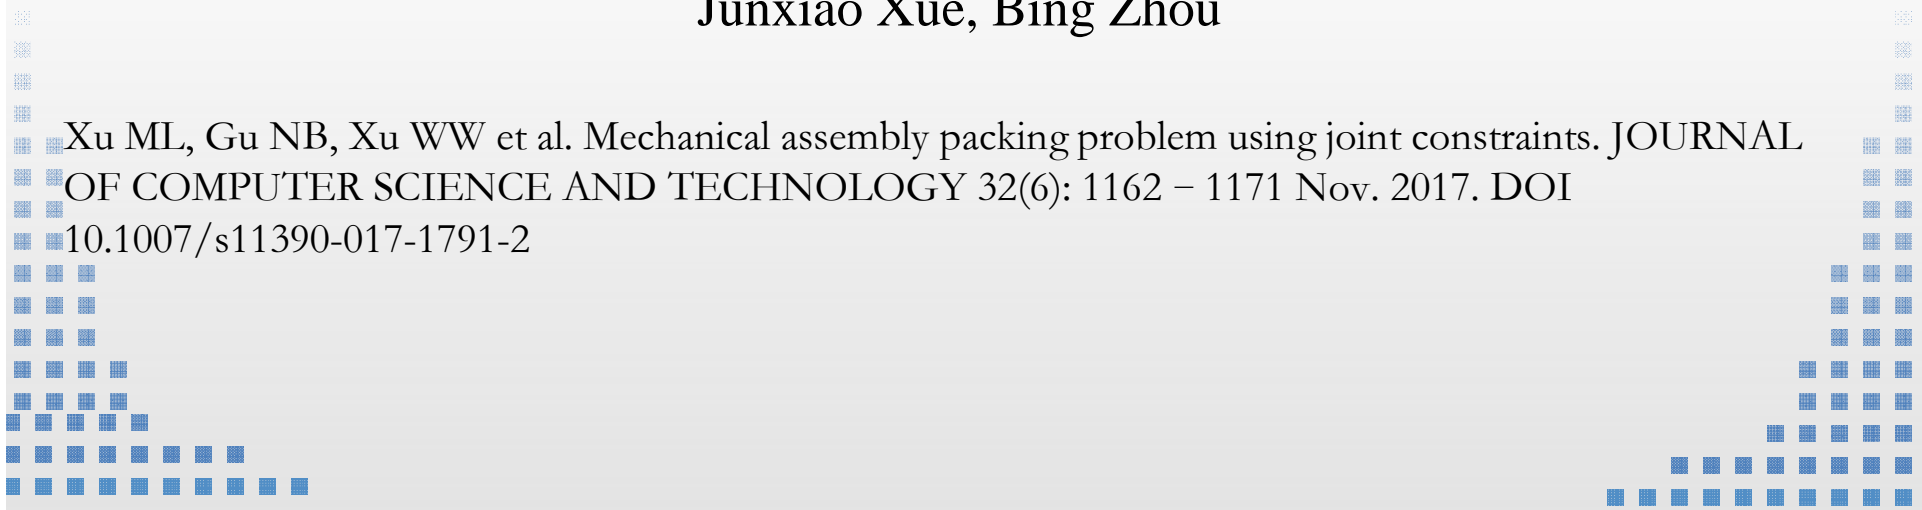

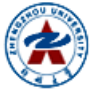

# Background

- The packing problem is on how to pack a group of items into a container with **the smallest packaging volume.**
- **Combinatorial optimization problem.**

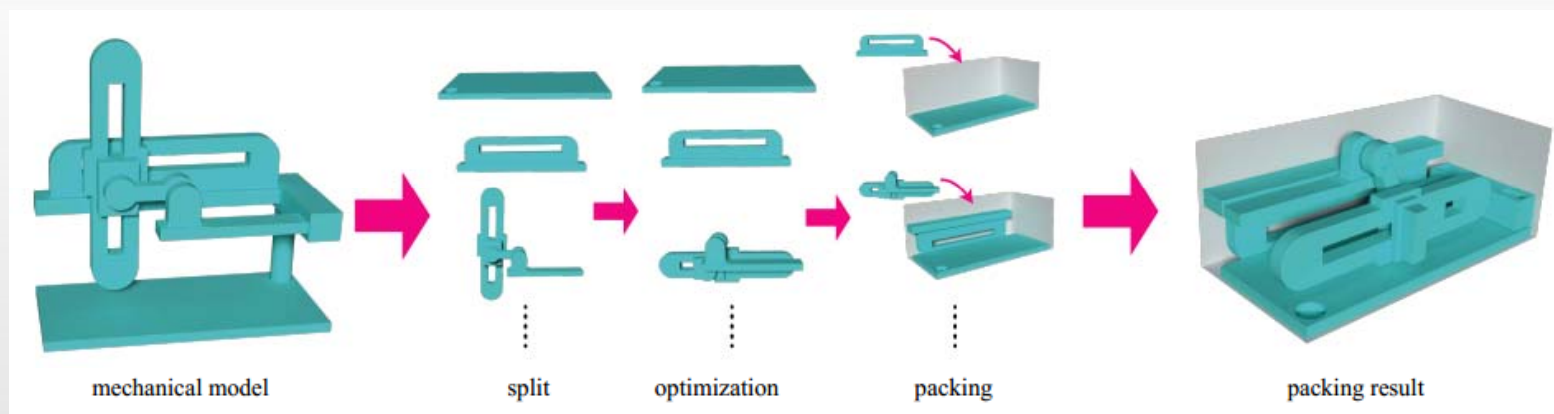

Fig. 1. The packing procedure of a crank slider model



# Our method-Framework

- Step1-Build the solution space of the search tree that contains all the splitting scheme;
- Step 2-Select a splitting scheme and split the mechanical model;
- Step 3-Minimize the volume of each group of the mechanical by optimizing joint parameters;
- Step 4-Pack and calculate whether meets the specified target!

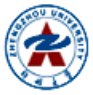

# Result

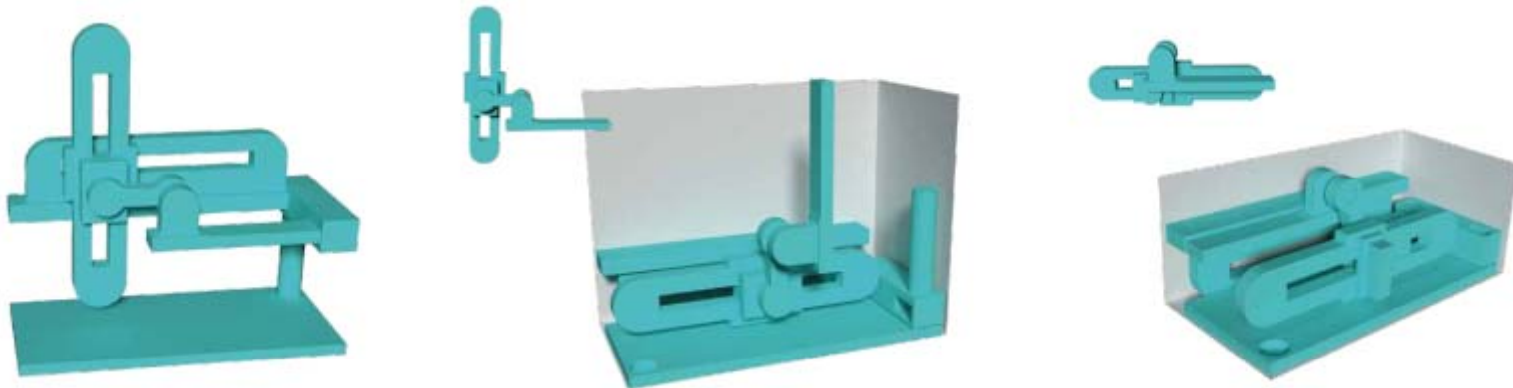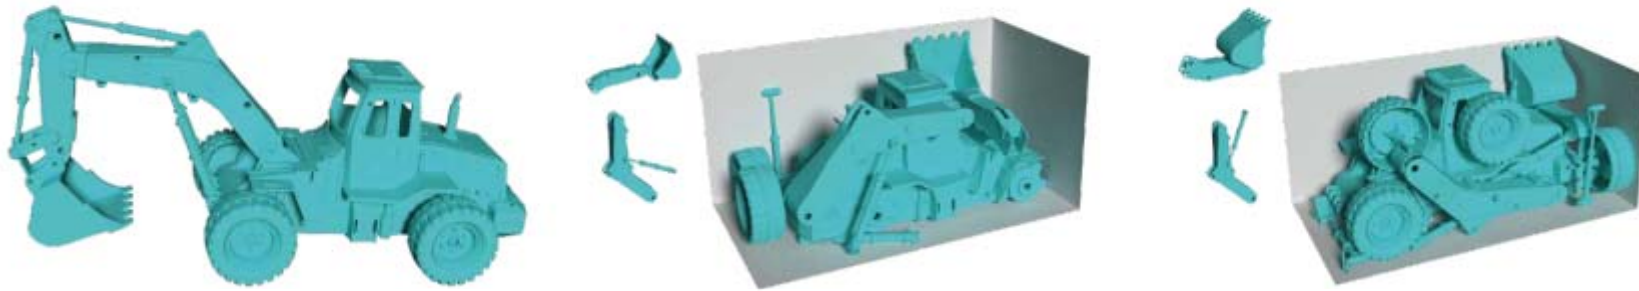

(a) the input mechanical model

(b) packing result with Attene's algorithm

(c) packing result with our algorithm



# Result

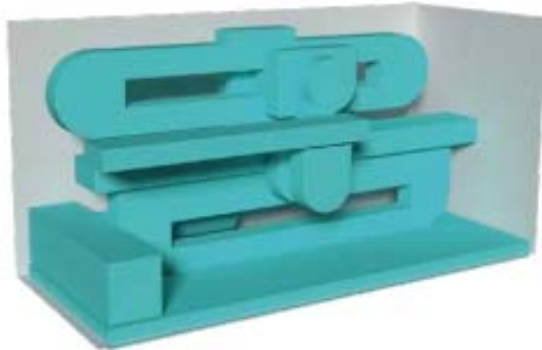

(a) bottom without extension

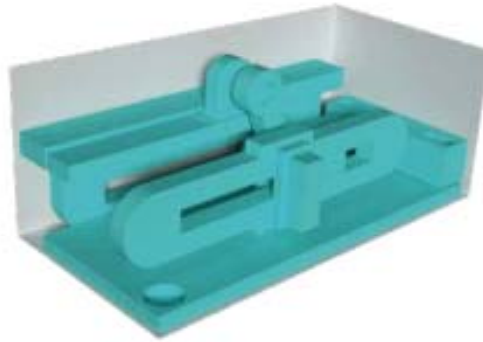

(b) bottom with extension of 25%

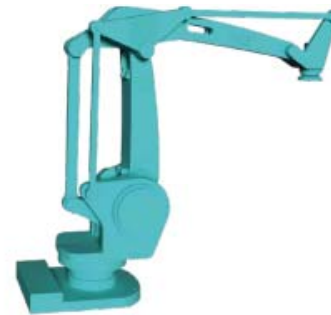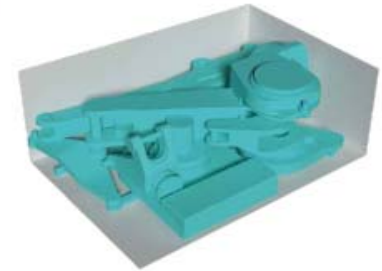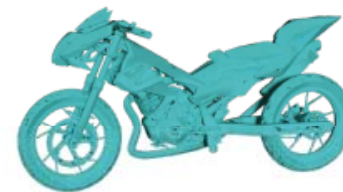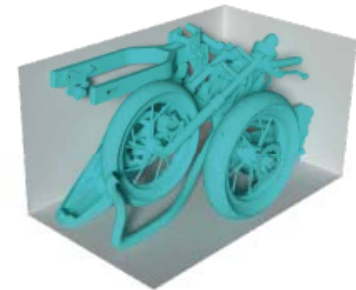

Supplement: 11390_2017_1791_MOESM1_ESM.pdf [file 11390_2017_1791_MOESM1_ESM.pdf]
